# Supplementary material
Source: PubMed Central journal article supplement (PMC8274692)
Supplement: ehp8666.smcontents.508.pdf [file ehp8666.smcontents.508.pdf]

**Note to readers with disabilities:** *EHP* strives to ensure that all journal content is accessible to all readers. However, some figures and Supplemental Material published in *EHP* articles may not conform to [508 standards](#) due to the complexity of the information being presented. If you need assistance accessing journal content, please contact [ehp508@niehs.nih.gov](mailto:ehp508@niehs.nih.gov). Our staff will work with you to assess and meet your accessibility needs within 3 working days.

### **Supplemental Material**

#### **Operating in a Climate Crisis: A State-of-the-Science Review of Life Cycle Assessment within Surgical and Anesthetic Care**

Jonathan Drew, Sean D. Christie, Peter Tyedmers, Jenna Smith-Forrester, and Daniel Rainham

#### **Table of Contents**

**Box S1.** Scopus search strategy.

**Box S2.** PubMed search strategy.

**Box S3.** Embase search strategy.

**Box S4.** Benchmark articles.

**Table S1.** Completed STARR-LCA Systematic Review Checklist.

**Table S2.** Inclusion and exclusion criteria.

#### **References**

**Additional File-** Excel Document
